# Supplementary material for: Constitutive Activation of the Nlrc4 Inflammasome Prevents Hepatic Fibrosis and Promotes Hepatic Regeneration after Partial Hepatectomy
Source: Hindawi journal article supplement (doi:10.1155/2015/909827), 2015-01-01
Supplement: f1 [file 909827.f1.pdf]

**Supplemental Files:**

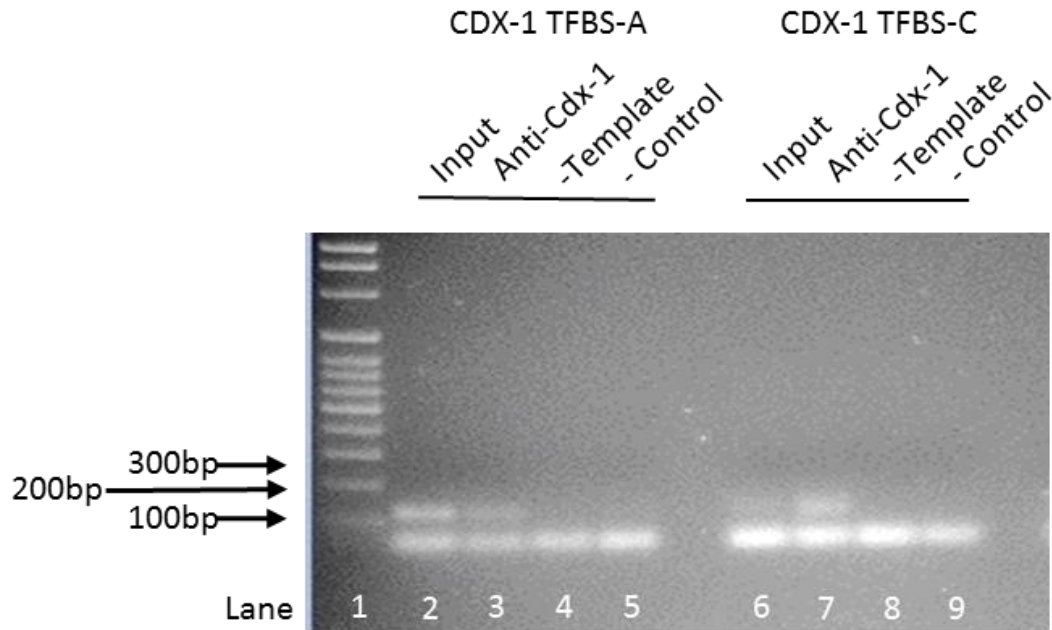

**Supplemental Figure 1.** Cdx-1 binds to the mouse Nlrc4 promoter. ChIP analysis of DNA in cross-linked chromatin from RAW264.7 cells. DNA fragments were precipitated using an anti-Cdx-1 antibody. Lanes 2-5: Primer sequence targeting TFBS-A using RT-PCR. Lanes 6-9: Primer sequence targeting TFBS-C using RT-PCR. Lane 1: DNA Ladder. Lane 2: 1% starting chromatin input. Lane 3: DNA precipitated with anti-Cdx-1 antibody Lane 4: Non-template control. Lane 5: negative control using anti-GFP antibody. Lane 6: 1% starting chromatin input. Lane 7: DNA precipitated with anti-Cdx-1 antibody Lane 8: Non-template control. Lane 9: negative control using anti-GFP antibody. RT-PCR products were visualized using a 2% agarose gel.

| <b>Primer Label</b> | <b>Forward Sequence (5'-3')</b> | <b>Reverse Sequence (5'-3')</b> | <b>Amplicon size</b> |
|---------------------|---------------------------------|---------------------------------|----------------------|
| CDX-1 TFBS-A        | ctctccagcccccttgaact            | atcttgagccatctgggttg            | 121                  |
| CDX-1 TFBS-B        | cccaatgtttccaccaatgt            | ccacagagaccacctgact             | 150                  |
| CDX-1 TFBS-C        | ctcaggaggcagagtcaggt            | tgtttgtttgtttgggaca             | 117                  |
| CDX-1 TFBS-D        | cattccctttgcttgagaa             | gatgccctcttctggtgtgt            | 150                  |

**Supplemental Table 1.** Primer sequences for ChIP. ChIP primer sets were custom designed using Primer3Plus PCR primer design tool (<http://sourceforge.net/projects/primer3/>).

| Primer Label          | Official Symbol | Forward Sequence (5'-3') | Reverse Sequence (5'-3') | Amplicon size |
|-----------------------|-----------------|--------------------------|--------------------------|---------------|
| 18S                   | Rn18s           | agaaacggctaccacatccaa    | gactcattccaattacagggc    | 123           |
| Cyclin D1             | Ccnd1           | cgtggcctctaagatgaagga    | cgggccgtagatagattgt      | 80            |
| IL-1 $\beta$          | Il1b            | caggcaggcagtatcactca     | tgtcctcatcctggaaggtc     | 86            |
| IL-18                 | Il18            | tccatgctttctggactcct     | ggctttcttctcctgatgc      | 89            |
| IL-6                  | Il6             | gttctctgggaaatcgtgga     | cagaattgccattgcacaac     | 52            |
| TNF- $\alpha$         | Tnf             | agccccagctctgtatcctt     | gagttggaccctgagccata     | 58            |
| I $\kappa$ B $\alpha$ | Nfkbia          | ctccagatgctaccgagag      | tagggcagctcatcctctgt     | 77            |
| Stat3                 | Stat3           | cagggtgtcagatcacatgg     | tagccagaccagaaggaga      | 77            |
| c-Fos                 | Fos             | cgggtttcaacgccgacta      | ttggcactagagacggacaga    | 166           |
| c-Myc                 | Myc             | gagtgcattgaccctcagt      | gaatcggacgaggtacagga     | 80            |
| Crp                   | Crp             | tctgcacaagggtacactg      | aagtcaccgcatcacgagtc     | 78            |

**Supplemental Table 2.** Primer sequences for qPCR. qPCR primer sets were custom designed using Primer3Plus PCR primer design tool (<http://sourceforge.net/projects/primer3/>) with design optimization for qPCR application.
